# Supplementary material
Source: PubMed Central journal article supplement (PMC4217219)

**Supplementary Figure 1. Prophylactic vaccination of B6-WT and B6-DK mice with GVAX and TAA Ab analysis.** Mice were vaccinated with irradiated  $5 \times 10^5$  B16-OVA and  $5 \times 10^5$  GVAX one week prior to challenge with  $1 \times 10^6$  B16-OVA. **A)** Sera was collected on day 25 after challenge and analyzed for anti-OVA IgG1 antibodies by ELISA. **B).** Percent tumor incidence = % of mice that developed tumors divided by % of total mice per group assessed on day 12 and 25 after challenge. Data are presented as cumulative of 2 independent experiments, n=10 mice per group.

**Supplementary Figure 2. Anti-OVA antibodies do not influence tumor growth.** *Rag2<sup>-/-</sup>* mice were challenged with  $5 \times 10^5$  B16-OVA, and treated with either PBS or 500  $\mu$ g anti-OVA IgG1 serum on day 0 and 200  $\mu$ g on day 7 after challenge. Serum was prepared by immunization of B6 with 100  $\mu$ g OVA protein in CFA, followed by 100  $\mu$ g OVA protein in IFA 7 days later. Serum was collected and concentrated on 50,000 MW Amicon filters followed by quantification of anti-OVA IgG1 antibody by ELISA.

**Supplementary Figure 3. Cross-reactivity of anti-desmin Ab to ss-DNA and ds-DNA.** Binding of anti-desmin Ab to single-stranded and double-stranded DNA was determined by ELISA.

**Figure S1.** Prophylactic vaccination of WT and DK mice with Gvax and anti-TAA  
Ab analysis

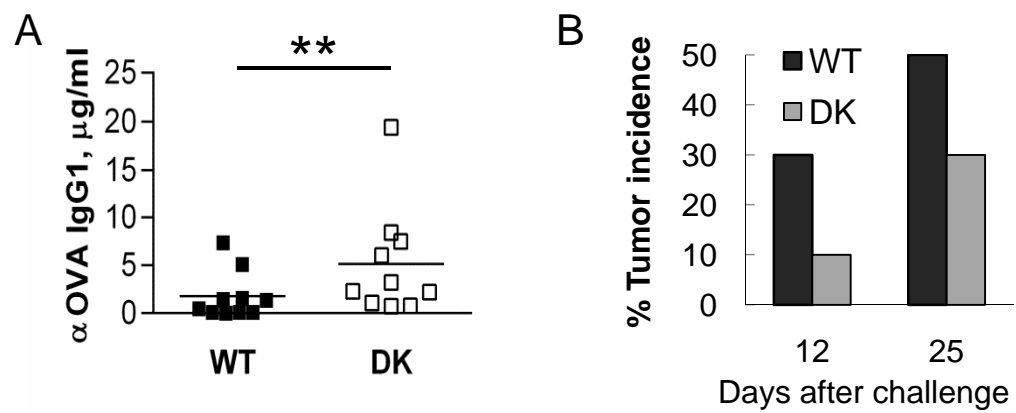

**Figure S2.** Anti-OVA antibodies do not influence tumor growth.

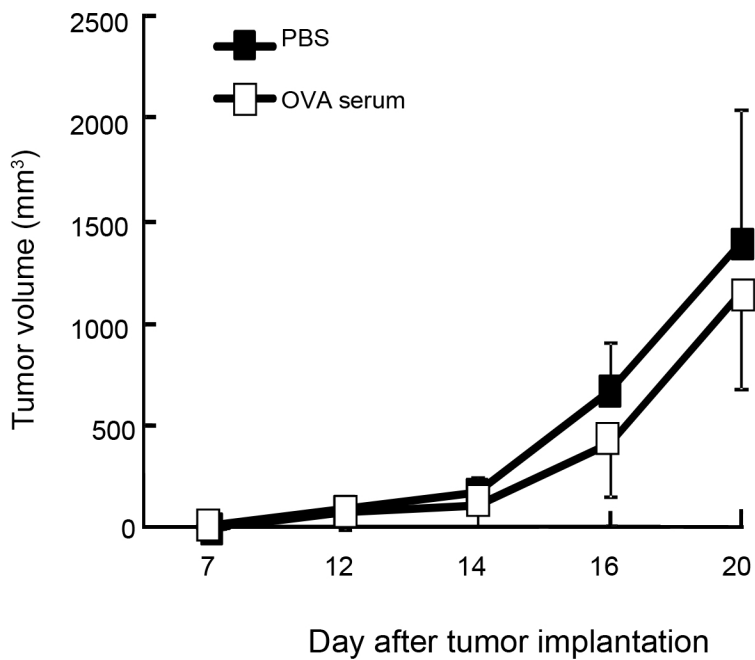

**Figure S3.** Cross-reactivity of anti-desmin Ab to ss-DNA and ds-DNA.

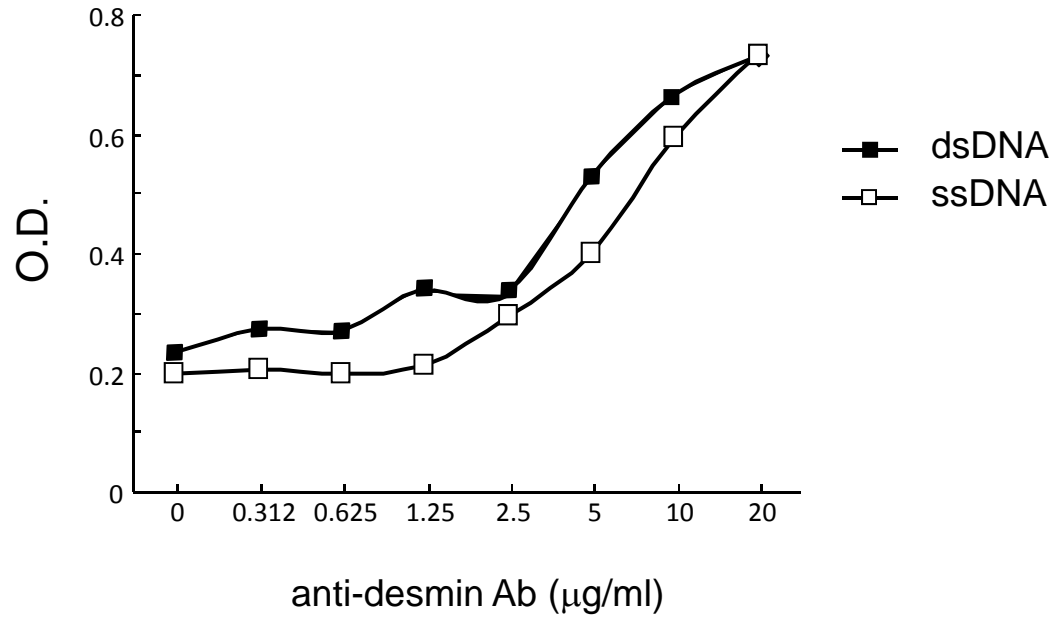

Supplement: NIHMS552638-supplement-1.pdf [file NIHMS552638-supplement-1.pdf]
